# Supplementary material for: The Staphylococcus aureus Global Regulator MgrA Modulates Clumping and Virulence by Controlling Surface Protein Expression
Source: PubMed Central journal article supplement (PMC4856396; doi:10.1371/journal.ppat.1005604), 2016-05-04
Supplement: ppat.1005604.s001.pdf [file ppat.1005604.s001.pdf]

## Supplementary Figure 1

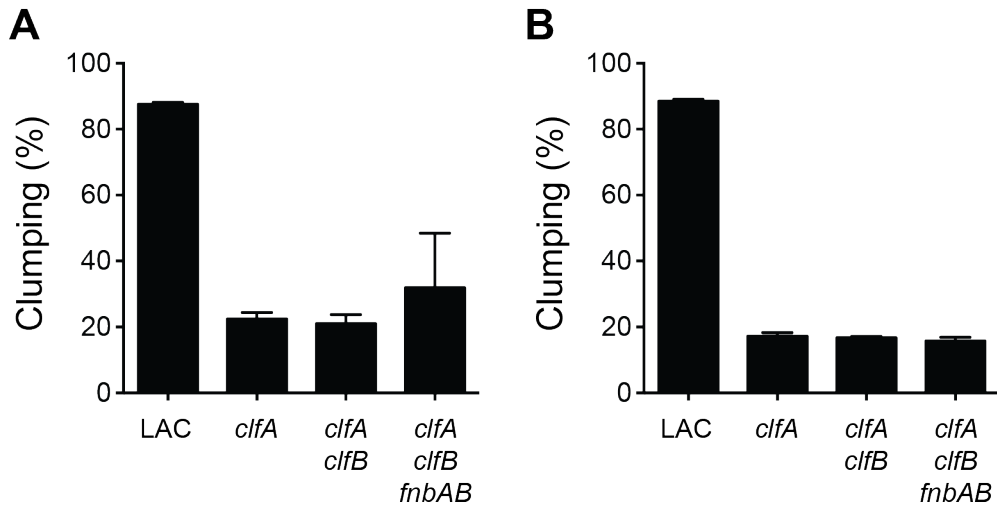

**Fig. S1** Clumping of LAC *clfA* *clfB* *fnbAB* mutants in the presence of human plasma (A) or purified human fibrinogen (B). Values represent averages and standard deviations of three separate experiments.
