# Supplementary material for: The Staphylococcus aureus Global Regulator MgrA Modulates Clumping and Virulence by Controlling Surface Protein Expression
Source: PubMed Central journal article supplement (PMC4856396; doi:10.1371/journal.ppat.1005604), 2016-05-04
Supplement: ppat.1005604.s002.pdf [file ppat.1005604.s002.pdf]

**Table S1.** Genes up  $\geq 4$ -fold in *mgrA* mutant

| SAUSA300 orf number | Fold change | Gene name    | Function                                              |
|---------------------|-------------|--------------|-------------------------------------------------------|
| 0113                | 22.3        | <i>spa</i>   | immunoglobulin G binding protein A                    |
| 0130                | 97.1        |              | NAD-dependent epimerase                               |
| 0131                | 106.5       |              | putative sugar transferase                            |
| 0132                | 48.2        |              | glycosyl transferase                                  |
| 0133                | 25.0        |              | hypothetical protein                                  |
| 0134                | 7.6         |              | polysaccharide extrusion protein                      |
| 0346                | 4.0         |              | high affinity iron transporter                        |
| 0547                | 20.0        | <i>sdrD</i>  | serine-aspartate repeat-containing protein SdrD       |
| 0577                | 4.7         |              | transcriptional regulator                             |
| 0954                | 43.9        | <i>atlR</i>  | MarR family transcriptional regulator                 |
| 1005                | 22.8        | <i>mntH</i>  | manganese transporter                                 |
| 1140                | 165.1       | <i>lytN</i>  | peptidoglycan hydrolase                               |
| 1141                | 91.0        | <i>fmhC</i>  | endopeptidase resistance protein                      |
| 1142                | 14.4        | <i>dprA</i>  | DNA protecting protein                                |
| 1202                | 8.0         |              | XRE-family transcriptional regulator                  |
| 1214                | 4.8         |              | putative threonine aldolase                           |
| 1294                | 5.8         |              | hypothetical protein                                  |
| 1327                | 44.7        | <i>ebh</i>   | cell surface protein                                  |
| 1702                | 7.7         | <i>sasC</i>  | cell surface protein                                  |
| 1739                | 4.4         |              | hypothetical protein                                  |
| 1740                | 4.6         |              | putative permease                                     |
| 1741                | 4.7         |              | putative lipoprotein                                  |
| 2109                | 24.5        | <i>fmtB</i>  | truncated FmtB protein                                |
| 2110                | 41.4        | <i>fmtB</i>  | truncated FmtB protein                                |
| 2218                | 10.3        | <i>sarV</i>  | MarR family transcriptional regulator                 |
| 2237                | 8.6         |              | putative urea transporter                             |
| 2238                | 74.3        | <i>ureA</i>  | urease subunit gamma                                  |
| 2239                | 61.5        | <i>ureB</i>  | urease subunit beta                                   |
| 2240                | 33.7        | <i>ureC</i>  | urease subunit alpha                                  |
| 2241                | 22.5        | <i>ureE</i>  | urease accessory protein UreE                         |
| 2242                | 20.2        | <i>ureF</i>  | urease accessory protein UreF                         |
| 2243                | 14.9        | <i>ureG</i>  | urease accessory protein UreG                         |
| 2244                | 13.0        | <i>ureD</i>  | urease accessory protein UreD                         |
| 2435                | 7.5         | <i>sasG</i>  | truncated surface protein G                           |
| 2436                | 8.3         | <i>sasG</i>  | truncated surface protein G                           |
| 2440                | 5.4         | <i>fnbB</i>  | fibronectin binding protein B                         |
| 2463                | 17.2        | <i>ddh</i>   | D-lactate dehydrogenase                               |
| 2465                | 21.5        |              | putative peptide transport system ATP-binding protein |
| 2466                | 8.6         |              | putative peptide transport system permease protein    |
| 2488                | 6.9         | <i>feoA</i>  | ferrous iron transport protein A                      |
| 2522                | 4.6         |              | hypothetical protein                                  |
| 2523                | 4.4         |              | hypothetical protein                                  |
| 2524                | 4.2         |              | hypothetical protein                                  |
| 2555                | 10.7        |              | glutathione peroxidase                                |
| 2585                | 4.7         | <i>asp3</i>  | accessory secretory protein Asp3                      |
| 2586                | 5.1         | <i>asp2</i>  | accessory secretory protein Asp2                      |
| 2587                | 5.5         | <i>asp1</i>  | accessory secretory protein Asp1                      |
| 2588                | 5.2         | <i>secY2</i> | preprotein translocase subunit SecY2                  |
| 2589                | 5.0         | <i>sraP</i>  | serine-rich adhesin for platelets                     |
| 2596                | 13.8        | <i>cap1C</i> | capsular polysaccharide biosynthesis protein Cap1C    |

|      |      |              |                                                    |
|------|------|--------------|----------------------------------------------------|
| 2597 | 18.9 | <i>cap1B</i> | capsular polysaccharide biosynthesis protein Cap1B |
| 2598 | 18.5 | <i>cap1A</i> | capsular polysaccharide biosynthesis protein Cap1A |
| 2612 | 4.2  | <i>hisG</i>  | ATP phosphoribosyltransferase catalytic subunit    |
| 2613 | 5.2  | <i>hisZ</i>  | ATP phosphoribosyltransferase regulatory subunit   |
| 2614 | 7.7  |              | putative polysaccharide deacetylase                |

#### Genes down $\geq 4$ -fold in *mgrA* mutant

| SAUSA300 orf number | Fold change | Gene name    | Function                                            |
|---------------------|-------------|--------------|-----------------------------------------------------|
| 0067                | 5.1         |              | universal stress protein                            |
| 0151                | 5.7         | <i>adhE</i>  | bifunctional acetaldehyde-CoA/alcohol dehydrogenase |
| 0152                | 8.7         | <i>cap5A</i> | capsular polysaccharide biosynthesis protein Cap5A  |
| 0153                | 4.0         | <i>cap5B</i> | capsular polysaccharide biosynthesis protein Cap5B  |
| 0154                | 5.0         | <i>cap5C</i> | capsular polysaccharide biosynthesis protein Cap5C  |
| 0156                | 4.2         | <i>cap5E</i> | capsular polysaccharide biosynthesis protein Cap5E  |
| 0174                | 4.7         |              | hypothetical protein                                |
| 0175                | 4.8         |              | putative lipoprotein                                |
| 0176                | 5.2         |              | ABC transporter permease                            |
| 0177                | 6.1         |              | hypothetical protein                                |
| 0178                | 4.4         |              | hypothetical protein                                |
| 0220                | 4.2         | <i>pflB</i>  | formate acetyltransferase                           |
| 0221                | 4.9         | <i>pflA</i>  | pyruvate formate-lyase activating enzyme            |
| 0382                | 4.1         |              | sodium:dicarboxylate symporter family protein       |
| 0491                | 5.5         | <i>cysK</i>  | cysteine synthase A                                 |
| 0594                | 5.1         | <i>adh</i>   | alcohol dehydrogenase                               |
| 0667                | 4.5         |              | hypothetical protein                                |
| 0672                | 3985        | <i>mgrA</i>  | transcriptional regulator                           |
| 0673                | 5.7         |              | cobalamin synthesis protein/P47K family protein     |
| 0776                | 5.0         | <i>nuc</i>   | nuclease                                            |
| 0815                | 8.9         | <i>ear</i>   | Ear protein                                         |
| 1295                | 17.1        |              | CSD family cold shock protein                       |
| 1329                | 4.2         |              | amino acid permease                                 |
| 1330                | 4.3         | <i>ilvA</i>  | threonine dehydratase                               |
| 1331                | 4.1         | <i>ald</i>   | alanine dehydrogenase                               |
| 1381                | 19.2        | <i>lukF</i>  | Panton-Valentine leukocidin, LukF-PV                |
| 1382                | 23.4        | <i>lukS</i>  | Panton-Valentine leukocidin, LukS-PV                |
| 1440                | 5.8         |              | hypothetical protein                                |
| 1581                | 7.5         |              | hypothetical protein                                |
| 1582                | 4.4         |              | hypothetical protein                                |
| 1678                | 4.7         | <i>fhs</i>   | formate-tetrahydrofolate ligase                     |
| 1753                | 8.7         | <i>spIF</i>  | serine protease SpIF                                |
| 1754                | 7.1         | <i>spIE</i>  | serine protease SpIE                                |
| 1755                | 8.4         | <i>spID</i>  | serine protease SpID                                |
| 1756                | 8.0         | <i>spIC</i>  | serine protease SpIC                                |
| 1757                | 10.2        | <i>spIB</i>  | serine protease SpIB                                |
| 1758                | 10.2        | <i>spIA</i>  | serine protease SpIA                                |
| 1918                | 5.9         |              | truncated beta-hemolysin                            |
| 1919                | 4.9         |              | staphylococcal complement inhibitor SCIN            |
| 1920                | 16.0        | <i>chs</i>   | chemotaxis-inhibiting protein CHIP                  |
| 1974                | 7.9         | <i>lukB</i>  | leukocidin                                          |
| 1975                | 7.5         | <i>lukA</i>  | leukocidingr                                        |
| 2164                | 4.5         |              | hypothetical protein                                |

|      |     |             |                                                   |
|------|-----|-------------|---------------------------------------------------|
| 2245 | 4.8 | <i>sarR</i> | SarR transcriptional regulator                    |
| 2453 | 5.8 |             | ABC transporter ATP-binding protein               |
| 2454 | 6.1 |             | membrane spanning protein                         |
| 2550 | 5.7 | <i>nrdG</i> | anaerobic ribonucleotide reductase, small subunit |
| 2551 | 4.5 | <i>nrdD</i> | anaerobic ribonucleoside triphosphate reductase   |
| 2572 | 6.9 | <i>aur</i>  | zinc metalloproteinase aureolysin                 |
