# Supplementary material for: The Staphylococcus aureus Global Regulator MgrA Modulates Clumping and Virulence by Controlling Surface Protein Expression
Source: PubMed Central journal article supplement (PMC4856396; doi:10.1371/journal.ppat.1005604), 2016-05-04
Supplement: ppat.1005604.s003.pdf [file ppat.1005604.s003.pdf]

**Table S2.** Primers used in this work

| Code  | Name                      | Sequence                                                               |
|-------|---------------------------|------------------------------------------------------------------------|
| HC3   | TetM 5'NheI               | GTTAGCTAGCCCTAGGCAAATATGCTCTTACGTGC                                    |
| HC4   | TetM 3'NheI               | GGCATGCTAGCGCACTAAGTTATTTTATTGAACATATATCTTAC                           |
| HC28  | Ebh_N_delA_EcoRI          | GCATGAATTCGCGAAATTGTATTGAATCGTCA                                       |
| HC41  | ArlR_5NdeI                | GTACATATGATGACGCAAATTTAATAGTAGAAGATGAAC                                |
| HC42  | ArlR_3XhoI                | GATCTCGAGTCATCGTATCACATACCCAACG                                        |
| HC53  | Ebh delB MCS              | ACGCGTGGTACCGCTAGCATGTTGTACGTTACCATTATCAGATG                           |
| HC54  | Ebh delC MCS              | GCTAGCGGTACCACGCGTTTGAACAATGGTATTGCTCGAATTTCC                          |
| HC55  | Ebh delD Sall             | GTTTCGTCGACTGA TGC TGA CTT TTT GTC TTT GGA T                           |
| HC62  | Ebh GSP-RT                | CAT GAG TAG CAG ATA ATG ATT GAC CAT                                    |
| HC63  | Ebh GSP1                  | GTA CTT GAG ATT CTC GAT TCT CAG                                        |
| HC64  | Ebh GSP2                  | TAA CCA CGC TTG CTG GTT GAT                                            |
| HC116 | MgrA delA SacI            | GAC GAGCTC TCACTTAGTTTCAACTGATCTTCCA                                   |
| HC117 | MgrA delB                 | CTC GAG GGT ACC GCT AGC AGA CAT TAA AGT TCT CCT CCA GAC                |
| HC118 | MgrA delC                 | GCT AGC GGT ACC CTC GAG TAA TTA ACT TTT GTC ATG ACA ATT<br>AAA GTA ATG |
| HC119 | MgrA delD Sall            | CGT GTC GAC GGTCTTCTGGTTCAGGAAA                                        |
| HC148 | MgrA down<br>3'HindIII    | CCC AAGCTT TTA TTT TTC CTT TGT TTC ATC AAA TGC ATG                     |
| HC156 | ErmC +promoter<br>5'BsrGI | GTTGTT TGTACA CAATAATCGCATCCGATTGCAGTAT                                |
| HC157 | ErmC 3'NheI               | GTTGTT GCT AGC CGA TTC ACA AAA AAT AGG CAC ACG                         |
| HC169 | MgrA prom3<br>5'BamHI     | CTC GGATCC GACAAGTTCTTGTTTAAGATCGCAAC                                  |
| HC172 | scv4-erm                  | GAGCCGATTTCAAAGATATTATCATGTTC                                          |
| HC184 | PmgrA v2 5'HindIII        | AAAAAGCTTCGTCCCTTTTAAAGCAATG                                           |
| HC185 | PmgrA v3 5'HindIII        | AAAAAGCTTAACGTGGTTTTACCACTACCCAAA                                      |
| HC187 | MgrA 3'Sall               | CCC GTCGAC TTA TTT TTC CTT TGT TTC ATC AAA TGC ATG                     |
| HC190 | MgrA 5'KpnI               | GTA GGTACC ATGTCTGATCAACATAATTTAAAAGAACAGC                             |
| HC191 | PmgrA2 3'KpnI             | AAGGTACC AAT AAG AAT ATC CAT AAT TAA CGG ATT TTT GG                    |
| HC194 | PmgrA3 3'KpnI             | AAGGTACCTCC GTT TTT TTC TCT TTT CGG ATT G                              |
| HC197 | ebh int fwd               | TCGGTTGAGTCAAGAGCTG                                                    |
| HC198 | ebh int rev               | GATAGCCCGAACCATCATTA                                                   |
| HC246 | MW2sasG delA<br>EcoRI     | ATGGAATTCAATGATTTGAAAAGCAAGAGCAATA                                     |
| HC247 | MW2sasG delB              | CTCGAGGGTACCGCTAGCATCTCTCATTTGCATACTCCTTTTTTCC                         |
| HC248 | MW2 sasG delC             | GCTAGCGGTACCCTCGAGGCTGGATTAATGTTATTGGCACGT                             |
| HC249 | MW2sasG delD<br>Sall      | GAT GTC GAC TTGATGTTATTGCAAGTAAAGGAAT                                  |
| HC288 | PsraP v1 5'HindIII        | GAAAAGCTTGTG AAT TAA ATG CAT CCT TAC TAA AC                            |
| HC290 | PsraP v3 5'HindIII        | GAAAAGCTTATA TGA AAA CGA TTA CAT TTA GAC GAA                           |
| HC291 | PsraP 3'KpnI              | AAGGTACC CCT TGT ATT ATC TTT ACA TTC ATT AGA TTA TA                    |
| HC294 | sraP GSP-RT               | CCG TAG TTT TCA GTC CGT ATC C                                          |
| HC295 | sraP GSP1                 | CAC TAA ACT ATG ACT AAT AAA TGG TAG CC                                 |
| HC296 | sraP GSP2                 | TTCTTTAATTCCGGATTTTACCCAATT                                            |
| HC336 | sraP probe5 fwd           | TTTGTATCAAAAAAGAGTTGTATTAATGAATAGTGGCATATATTATAA                       |
| HC337 | sraP probe5 rev           | TTATAATATATGCCACTATTCAATTTAATACTCTTTTTTGATACAAA                        |
| HC338 | MW2 sraP delA<br>SacI     | GACGAGCTCACGATTACACAGTAGTGAATGAGAT                                     |
| HC339 | MW2 sraP delB             | CTCGAGGGTACCGCTAGCCCAGATTTATAAAGTCTTACTCTTGTTT                         |
| HC340 | MW2 sraP delC             | GCTAGCGGTACCCTCGAGTGGCGTTATGACATTATTAGTTGGT                            |

|                 |                           |                                                                       |
|-----------------|---------------------------|-----------------------------------------------------------------------|
| HC341           | MgrA delD Sall            | CGT GTC GAC CAT TAC AAT CGG CAT TGG TCC TG                            |
| HC346           | sraP probe5 rev<br>IRD700 | TTATAATATATGCCACTATTCAATTTAATACAACCTCTTTTTGATACAAA                    |
| HC347           | sraP probe5 mut<br>fwd    | TTTGTAGATGTCAAGCACCTCATTAATTGAATAGTGGCATATATTATAA                     |
| HC348           | sraP probe5 mut<br>rev    | TTA TAA TAT ATG CCA CTA TTC AAT TTA ATG AGG TGC TTG ACA TCT<br>ACA AA |
| HC349           | sraP probe 6 fwd          | CTGGAAAAAATTGGGTAAAATCCGGAATTAAGAAAATAGAAATGTTCAAA                    |
| HC350           | sraP probe 6 rev          | TTTGAACATTTCTATTTCTTTAATTCCGGATTTTACCCAATTTTTTCCAG                    |
| HC487           | ebh probe2 fwd<br>IRD700  | GAGCATAAATAAATTGTTCAACACATAGTTGTAATGTGTTTCAATACTTT                    |
| HC488           | ebh probe2 fwd<br>comp    | GAGCATAAATAAATTGTTCAACACATAGTTGTAATGTGTTTCAATACTTT                    |
| HC489           | ebh probe2 rev            | AAAGTATTGAAACACATTACAACCTATGTGTTGAACAATTTATTTATGCTC                   |
| HC492           | ebh probe 2 mut<br>fwd    | GAGCATAAATAAATTGTTTGTAAACATCAGAATAATGTGTTTCAATACTTT                   |
| HC493           | ebh probe 2 mut<br>rev    | AAAGTATTGAAACACATTATTCTGATGTTACAAACAATTTATTTATGCTC                    |
| qRT-PCR primers |                           |                                                                       |
| HC314           | sraP 1738 for             | ACTGTAGGCAATCAAACCATAGA                                               |
| HC315           | sraP 1851 rev             | CCG CTT GGT AAT CCT GTA ACT                                           |
| HC318           | secY2 367 for             | GTTTCGAAAGAACGTGTTTCAATCA                                             |
| HC319           | secY2 479 rev             | CGA TGC CGT AGC GAC TAT TT                                            |
| HC320           | asp1 876 for              | GAAGTATCAGCGGGAGAATACAA                                               |
| HC321           | asp1 1001 rev             | CAG CGT CAC TCA TAC CAT CTA TC                                        |
| HC322           | asp2 734 for              | GGAACGGGACGGTACATTTAG                                                 |
| HC323           | asp2 824 rev              | CTA CGA AAC GAC TAC CAC CAA G                                         |
| HC324           | asp3 521 for              | CAGAACCATCTGACACCTATCC                                                |
| HC325           | asp3 620 rev              | CCT CGA TAT TGT CGT CCA TCC                                           |
| HC467           | secA2 208 for             | GAAGCGAGCTGGAGAGTATTAG                                                |
| HC468           | secA2 303 rev             | GTTTGCATCTCCGCAATGTTA                                                 |
| HC328           | gtfA 1240 for             | GGCTCAGGACTAGGTATGATTG                                                |
| HC329           | gtfA 1352 rev             | CCA CAC TAT CTT CGT CGG TAT C                                         |
| HC330           | gtfB 589 for              | ATTAACCTCACTAGCCCTACCATTT                                             |
| HC331           | gtfB 692 rev              | TTC CCG GGA CAT TAC CAT TAC                                           |
